# Supplementary material for: Effect of Complexation with Closo-Decaborate Anion on Photophysical Properties of Copolyfluorenes Containing Dicyanophenanthrene Units in the Main Chain
Source: MDPI journal article supplement (doi:10.3390/micro3040063), 2023-11-30
Supplement: s1 [file s1]

Archive with 1 entries (1 files):
- micro-2640832-supplementary.pdf
